# Supplementary material for: Does the Combination of Resistance Training and A Nutritional Intervention Have A Synergic Effect on Muscle Mass, Strength, and Physical Function in Older Adults? A Systematic Review and Meta-Analysis
Source: Research Square preprint supplement (doi:10.21203/rs.3.rs-596096/v1), 2021-07-16
Supplement: Supplementary file 1 [file fe0a25324dc038b39d878a8a.docx]

1. Lean body mass


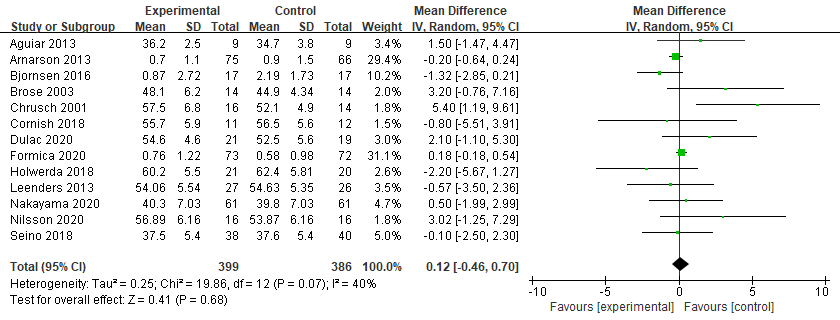


1. Appendicular skeletal muscle mass


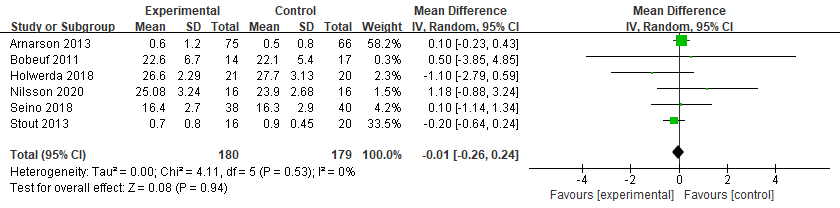


1. Hand grip strength


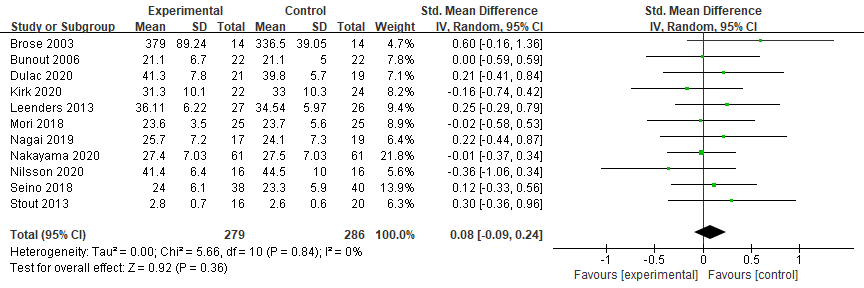


1. Knee extension strength


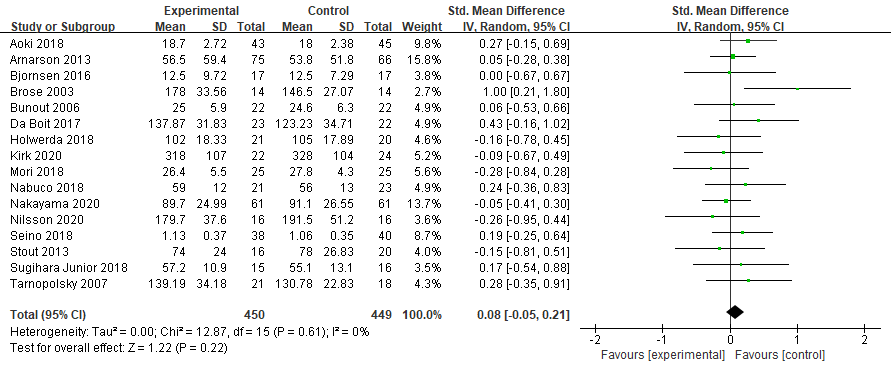


1. Chair stand test


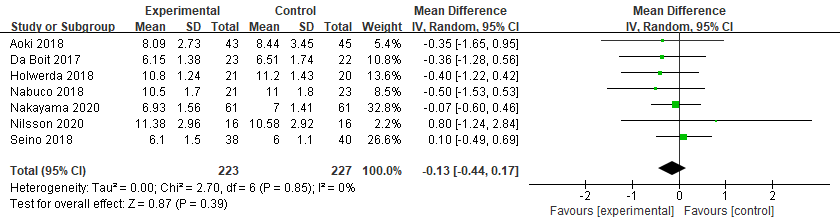


1. Timed up and go


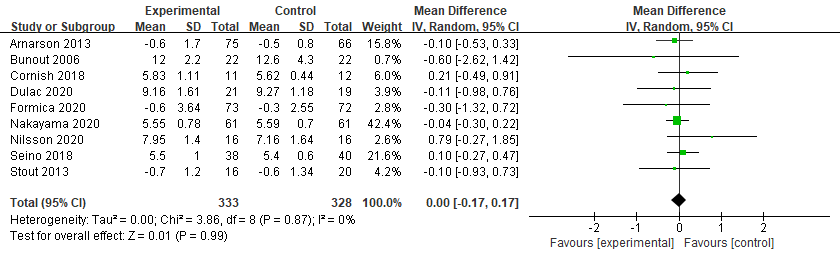


**Figure 3 Effect of resistance training and nutritional intervention on muscle mass, strength, and physical functional performance**
